# Supplementary material for: Interleukin-33 promotes inflammation-induced lymphangiogenesis via ST2/TRAF6-mediated Akt/eNOS/NO signalling pathway
Source: PubMed Central journal article supplement (PMC5587532; doi:10.1038/s41598-017-10894-x), 2017-09-06
Supplement: 41598_2017_10894_MOESM1_ESM.pdf [file 41598_2017_10894_MOESM1_ESM.pdf]

**Interleukin-33 promotes inflammation-induced lymphangiogenesis via**

**ST2/TRAF6-mediated Akt/eNOS/NO signalling pathway**

**Longhui Han<sup>1,3#\*</sup>, Minglian Zhang<sup>1#\*</sup>, Xu Liang<sup>2#</sup>, Xin Jia<sup>1#</sup>, Jinchen Jia<sup>1#</sup>, Miying  
Zhao<sup>1</sup> & Yiming Fan<sup>1</sup>**

<sup>1</sup> Hebei Provincial Key Laboratory of Ophthalmology, Hebei Provincial Eye institute, Hebei Provincial Eye Hospital, Xingtai, Hebei, 054001, China.

<sup>2</sup> Tianjin Eye Hospital, Tianjin, 300020, China.

<sup>3</sup> Tianjin Medical University Eye Hospital/Eye Institute, School of Optometry and Ophthalmology, Tianjin Medical University, Tianjin, 300384, China.

\* Correspondence and requests for materials should be addressed to L.H. (email: han-longhui@163.com) or Minglian.Z. (zhmlyk@sohu.com)

**SUPPLEMENTARY INFORMATION includes:**

Figure S1, Figure S2 and full-length blots (Figure S3 and S4).

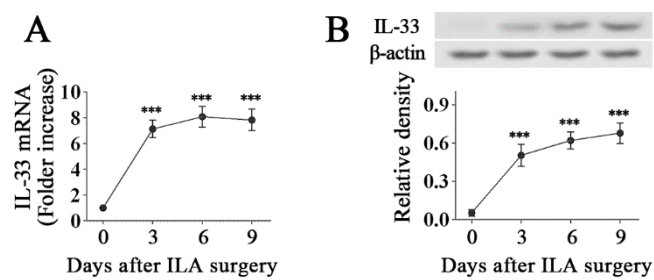

**Figure S1. IL-33 is involved in ILA**

(A): Real-time PCR shows the increased expression of IL-33 mRNA in the inflamed corneas after the ILA surgery. (B): Western blot shows the increased expression of IL-33 protein in the inflamed corneas after the ILA surgery. \*\*\* $p < 0.001$ .

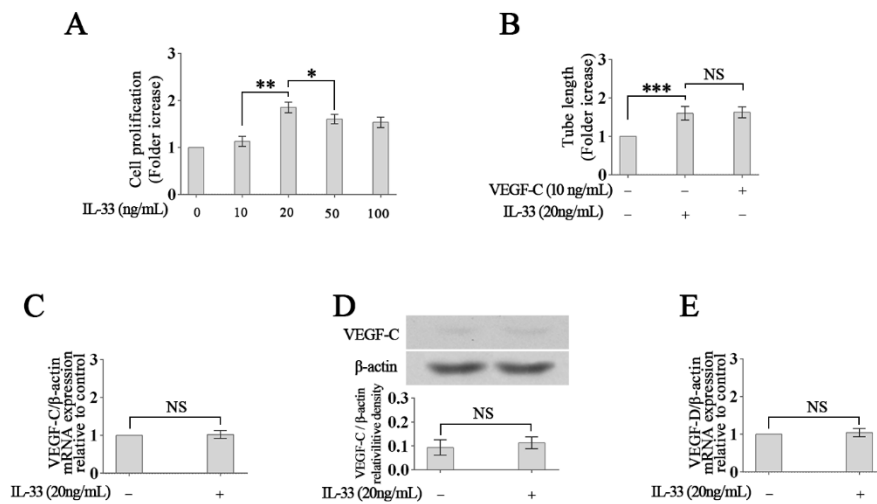

**Figure S2. IL-33 increases the LECs proliferation and tube formation in a VEGF-C/D independent way**

(A and B): IL-33 itself (without additional VEGF-C stimulation) also induces LECs proliferation and tube formation. (C-E): Real-time PCR and Western blot shows that IL-33 doesn't up-regulate the expression of pro-lymphangiogenic factors (VEGF-C/D) by LECs. \* $p < 0.05$ , \*\* $p < 0.01$ , \*\*\* $p < 0.001$ .

**Fig. 3A**

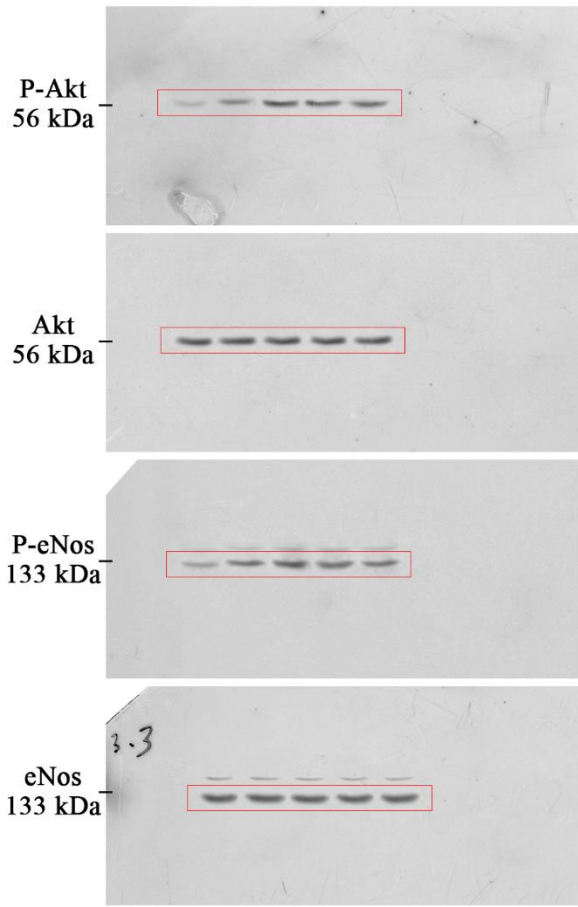

**Fig. 3B**

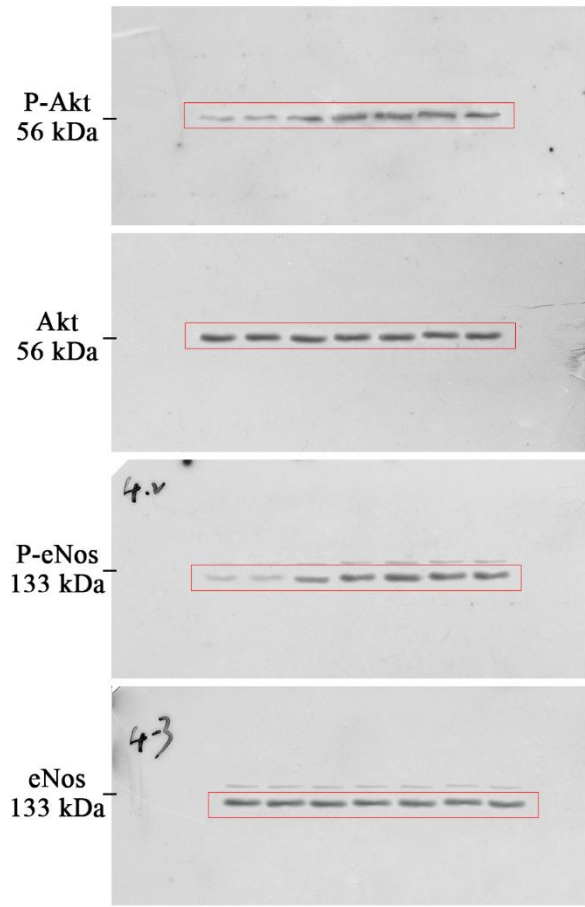

**Fig. 3C**

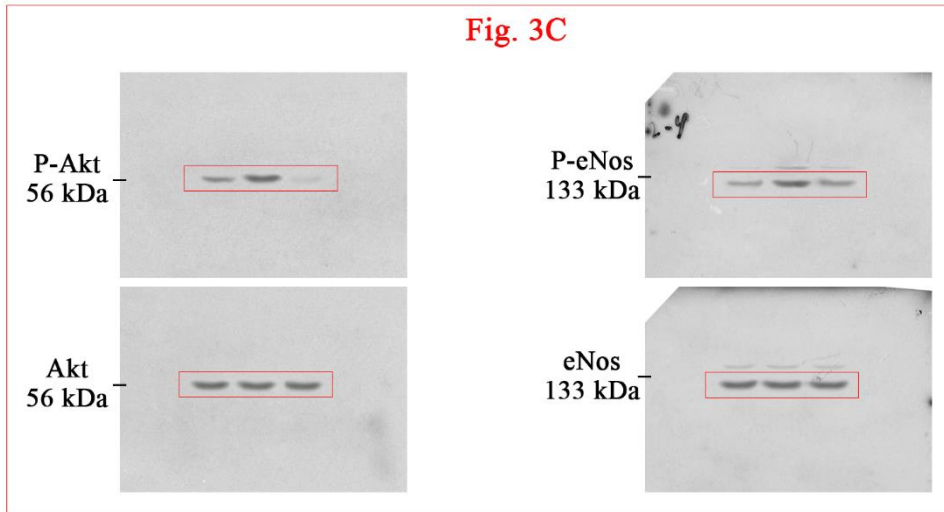

**Figure S3** Full-length blots for fig. 3

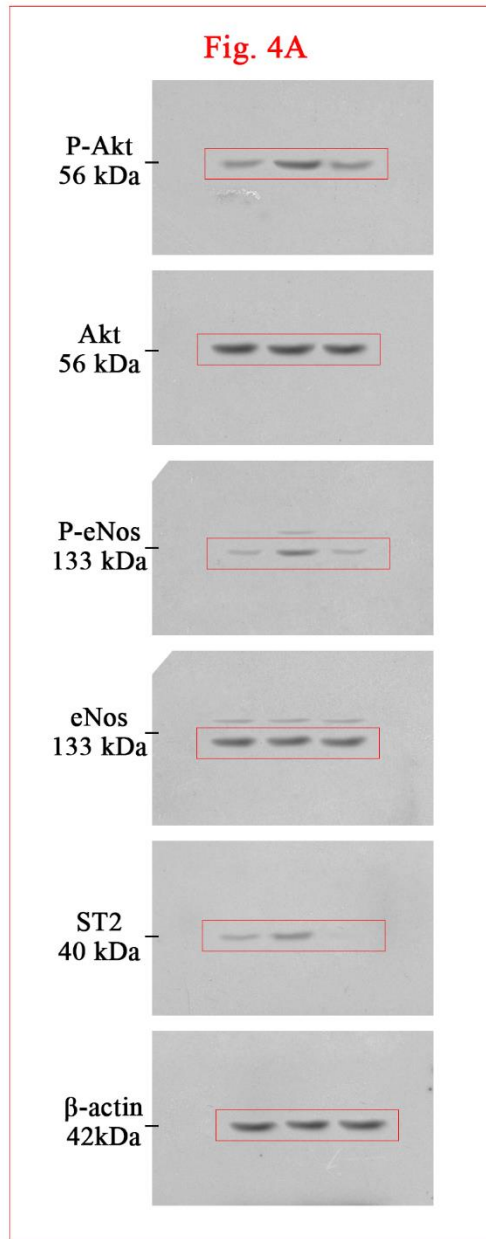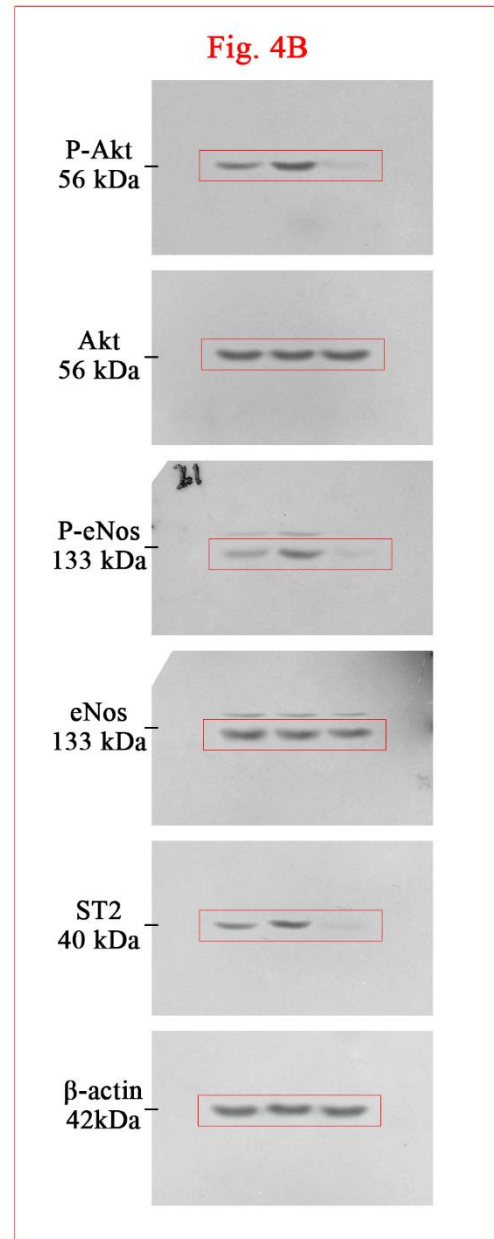

**Figure S4** Full-length blots for fig. 4
